# Supplementary material
Source: MDPI journal article supplement (https://www.mdpi.com/1424-8247/16/6/806)

# Synthesis, Physicochemical Characterization, Biological Evaluation, In Silico and Molecular Docking Studies of Pd(II) Complexes with P, S-Donor Ligands

Hizbullah Khan <sup>1,\*</sup>, Muhammad Sirajuddin <sup>1,\*</sup>, Amin Badshah <sup>2</sup>, Sajjad Ahmad <sup>3</sup>, Muhammad Bilal <sup>4</sup>, Syed Muhammad Salman <sup>5</sup>, Ian S. Butler <sup>6</sup>, Tanveer A. Wani <sup>7</sup> and Seema Zargar <sup>8</sup>

<sup>1</sup> Department of Chemistry, University of Science and Technology, Bannu 28100, Pakistan

<sup>2</sup> Department of Chemistry, Quaid-i-Azam University, Islamabad 45320, Pakistan;  
aminbadshah@qau.edu.pk

<sup>3</sup> Department of Health and Biological Sciences, Abasyn University, Peshawar 25000, Pakistan;  
sajjademman8@gmail.com

<sup>4</sup> Department of Chemistry, Kohat University of Science and Technology, Kohat 26000, Pakistan;  
mbilal@kust.edu.pk

<sup>5</sup> Department of Chemistry, Islamia College University, Peshawar 25120, Pakistan;  
salman@icp.edu.pk

<sup>6</sup> Department of Chemistry, University of McGill, Montreal H3A 0B8, QC, Canada;  
ian.butler@mcgill.ca

<sup>7</sup> Department of Pharmaceutical Chemistry, College of Pharmacy, King Saud University, P.O. Box 2457, Riyadh 11451, Saudi Arabia; twani@ksu.edu.sa

<sup>8</sup> Department of Biochemistry, College of Science, King Saud University, P.O. Box 22452, Riyadh 11451, Saudi Arabia; szargar@ksu.edu.sa

\* Correspondence: dr.hizbullah@ustb.edu.pk (H.K.); dr.sirajuddin@ustb.edu.pk (M.S.)

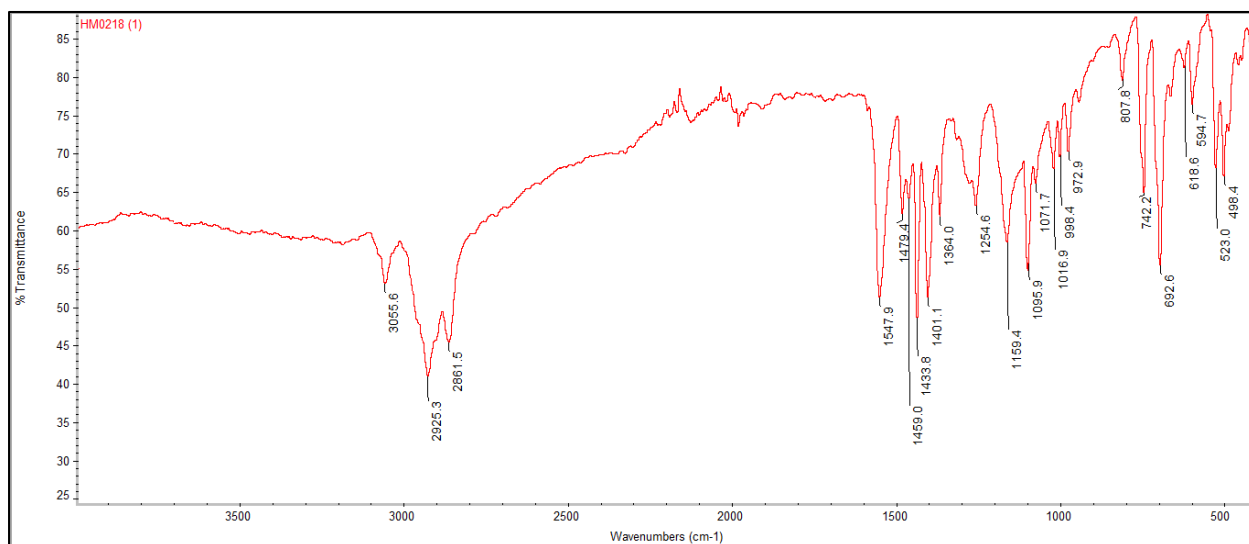

Figure S1. FTIR spectrum of complex 2.

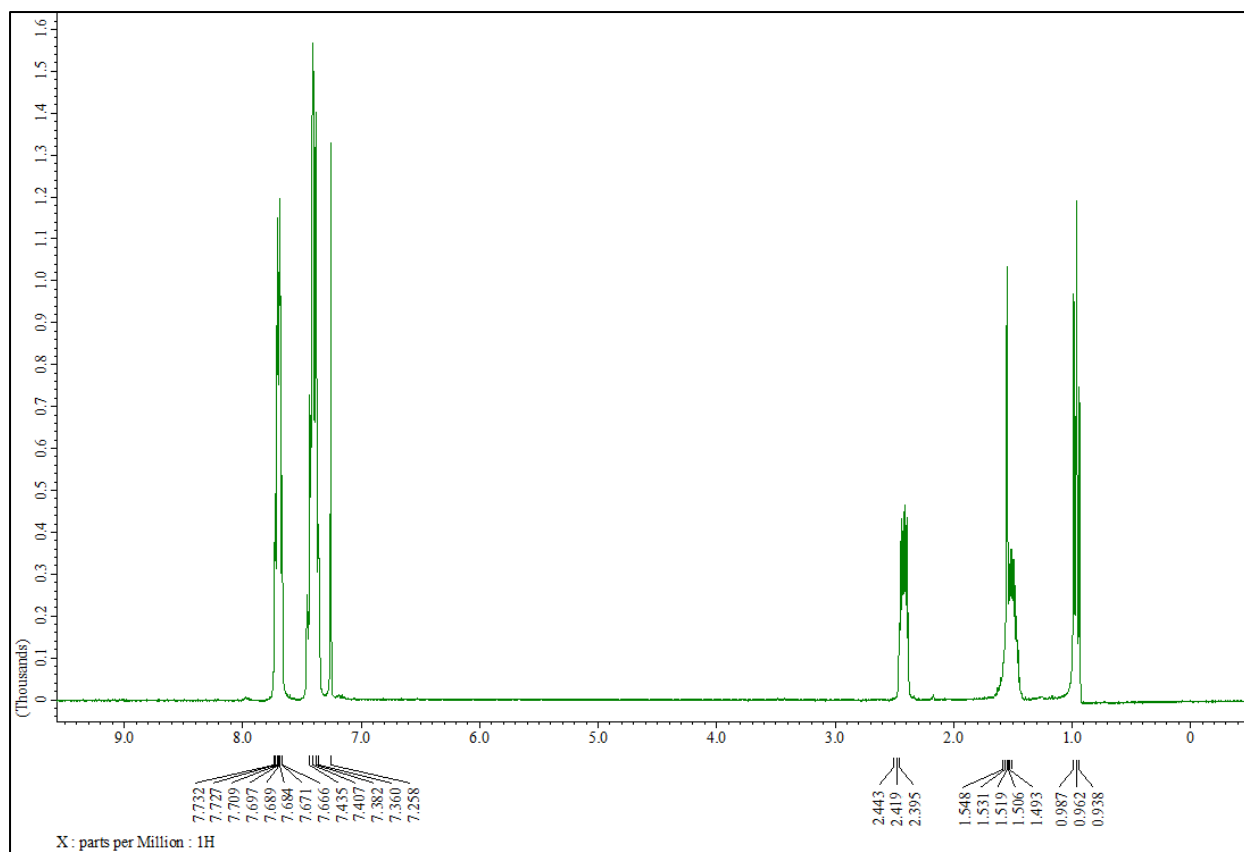

Figure S2. <sup>1</sup>H NMR of complex 1.

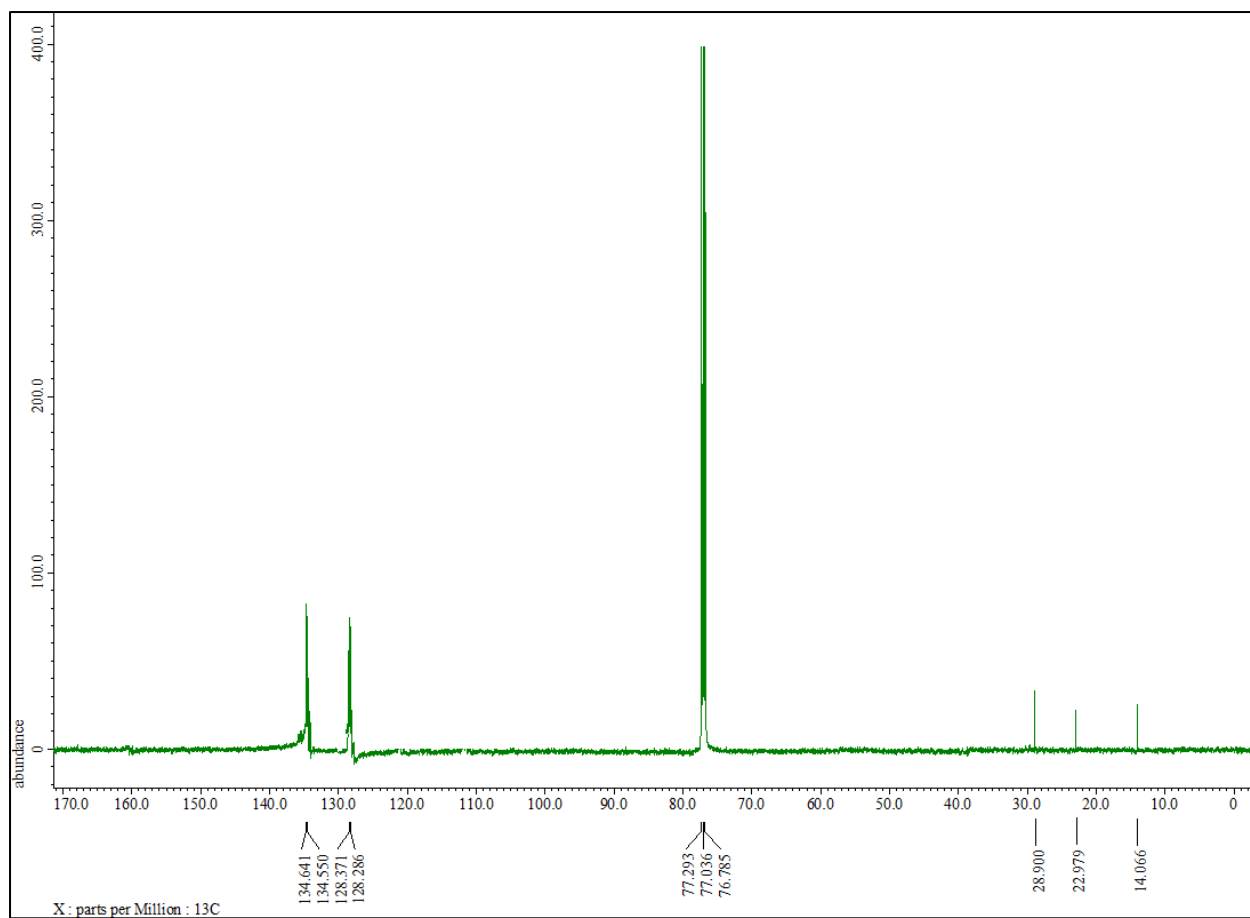

**Figure S3.**  $^{13}\text{C}$  NMR of complex 1.

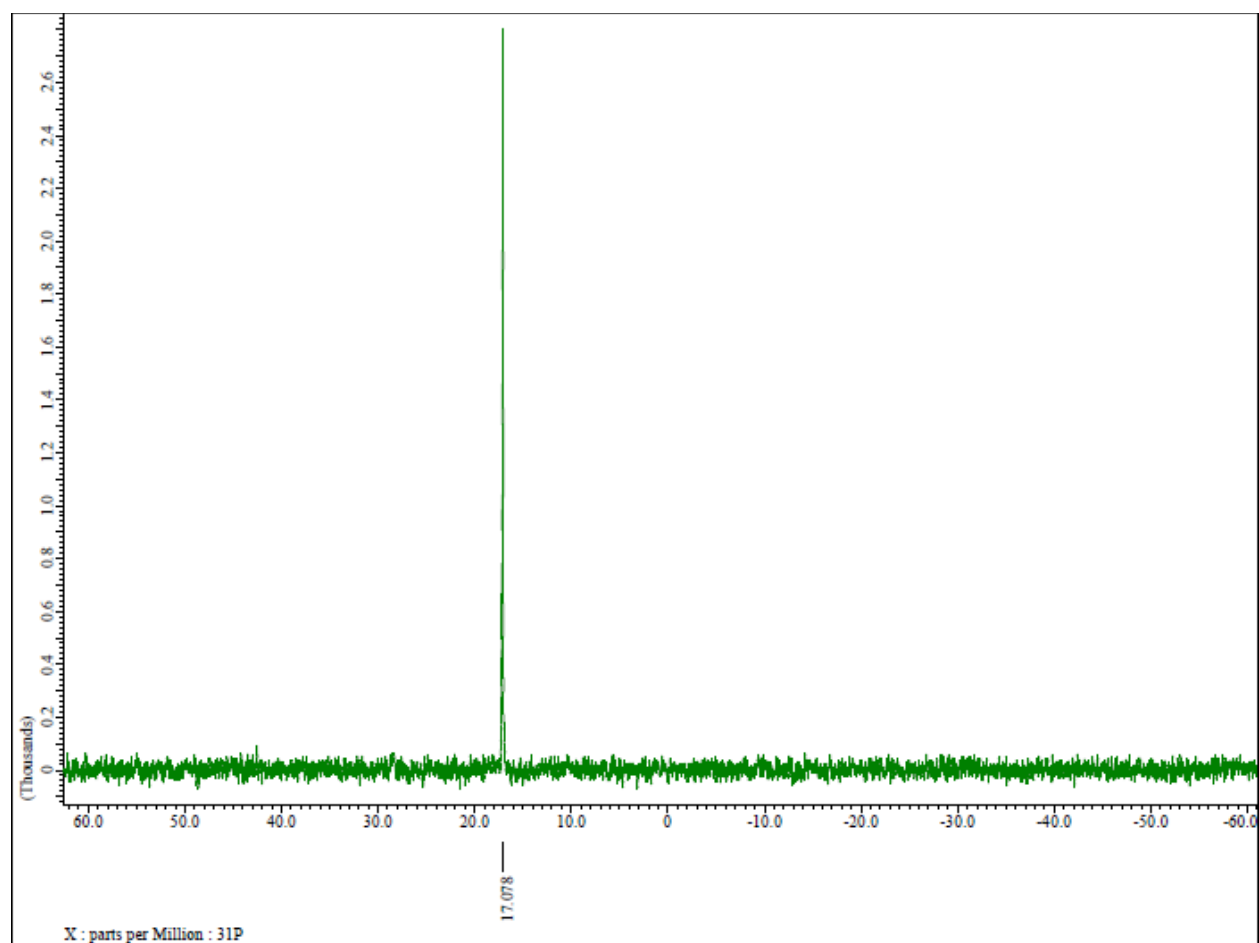

**Figure S4.**  $^{31}\text{P}$  NMR of complex 1.

**Table S1.** Binding energy score of starting organophosphorous Pd precursors with the receptor.

| Receptor                              | Ligand                                                                                                      | Binding Affinity<br>(kcal/mol) |
|---------------------------------------|-------------------------------------------------------------------------------------------------------------|--------------------------------|
| <i>E. coli</i> (PDB_ID:<br>6G9S)      | potassium dimethylcarbamdithioate                                                                           | -4.4988                        |
|                                       | (PR <sub>3</sub> ) <sub>2</sub> PdCl <sub>2</sub> where PR <sub>3</sub> = diphenyl-p-tolylphosphine         | -6.3463                        |
|                                       | (PR <sub>3</sub> ) <sub>2</sub> PdCl <sub>2</sub> where PR <sub>3</sub> = diphenyl-2-ethoxyphenyl phosphine | -4.6034                        |
|                                       | (PR <sub>3</sub> ) <sub>2</sub> PdCl <sub>2</sub> where PR <sub>3</sub> = diphenyl-p-tolylphosphine         | -6.8335                        |
| <i>K. pneumonia</i><br>(PDB_ID: 4EXS) | potassium dimethylcarbamdithioate                                                                           | -4.0926                        |
|                                       | (PR <sub>3</sub> ) <sub>2</sub> PdCl <sub>2</sub> where PR <sub>3</sub> = diphenyl-p-tolylphosphine         | -4.9375                        |
|                                       | (PR <sub>3</sub> ) <sub>2</sub> PdCl <sub>2</sub> where PR <sub>3</sub> = diphenyl-2-ethoxyphenyl phosphine | -5.3247                        |
|                                       | (PR <sub>3</sub> ) <sub>2</sub> PdCl <sub>2</sub> where PR <sub>3</sub> = diphenyl-p-tolylphosphine         | -5.0306                        |
| <i>S. aureus</i> (PDB_ID:<br>5ZH8)    | potassium dimethylcarbamdithioate                                                                           | -4.3260                        |
|                                       | (PR <sub>3</sub> ) <sub>2</sub> PdCl <sub>2</sub> where PR <sub>3</sub> = diphenyl-p-tolylphosphine         | -5.4957                        |
|                                       | (PR <sub>3</sub> ) <sub>2</sub> PdCl <sub>2</sub> where PR <sub>3</sub> = diphenyl-2-ethoxyphenyl phosphine | -6.1572                        |
|                                       | (PR <sub>3</sub> ) <sub>2</sub> PdCl <sub>2</sub> where PR <sub>3</sub> = diphenyl-p-tolylphosphine         | -6.0522                        |
| DR5 (PDB_ID:<br>1DU3)                 | potassium dimethylcarbamdithioate                                                                           | -4.3843                        |
|                                       | (PR <sub>3</sub> ) <sub>2</sub> PdCl <sub>2</sub> where PR <sub>3</sub> = diphenyl-p-tolylphosphine         | -6.4459                        |
|                                       | (PR <sub>3</sub> ) <sub>2</sub> PdCl <sub>2</sub> where PR <sub>3</sub> = diphenyl-2-ethoxyphenyl phosphine | -7.1002                        |

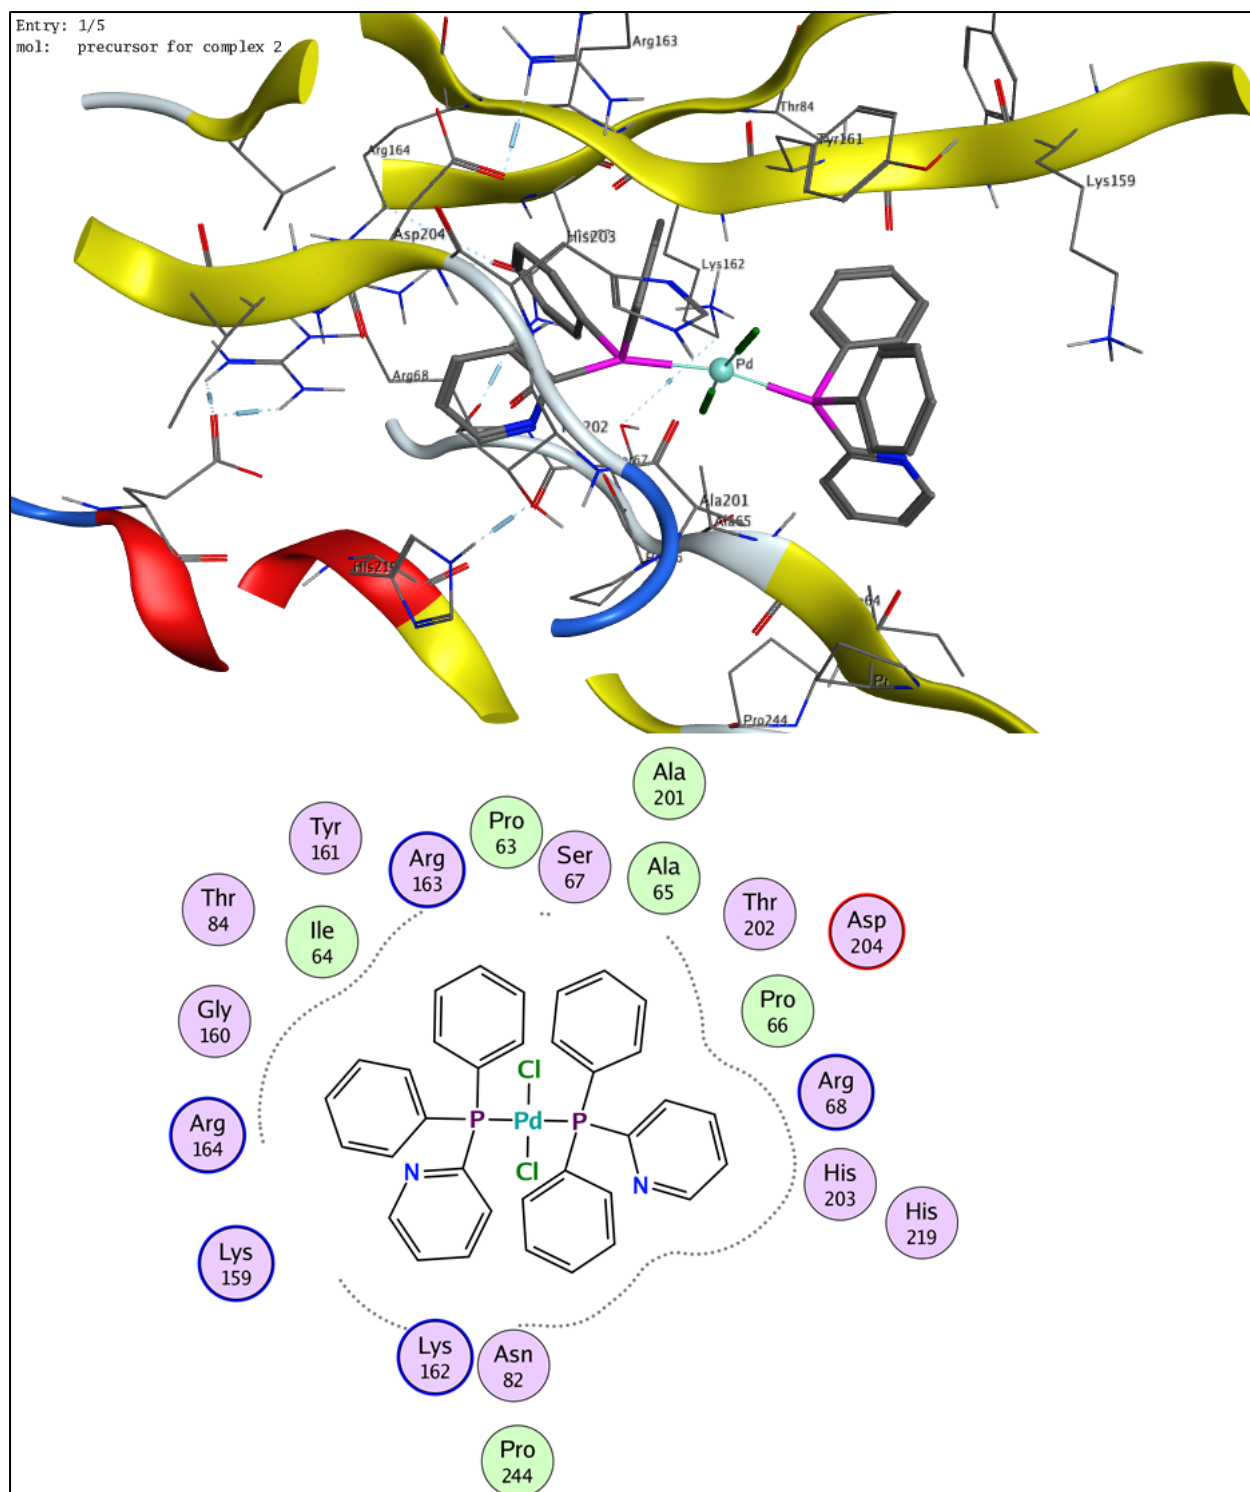

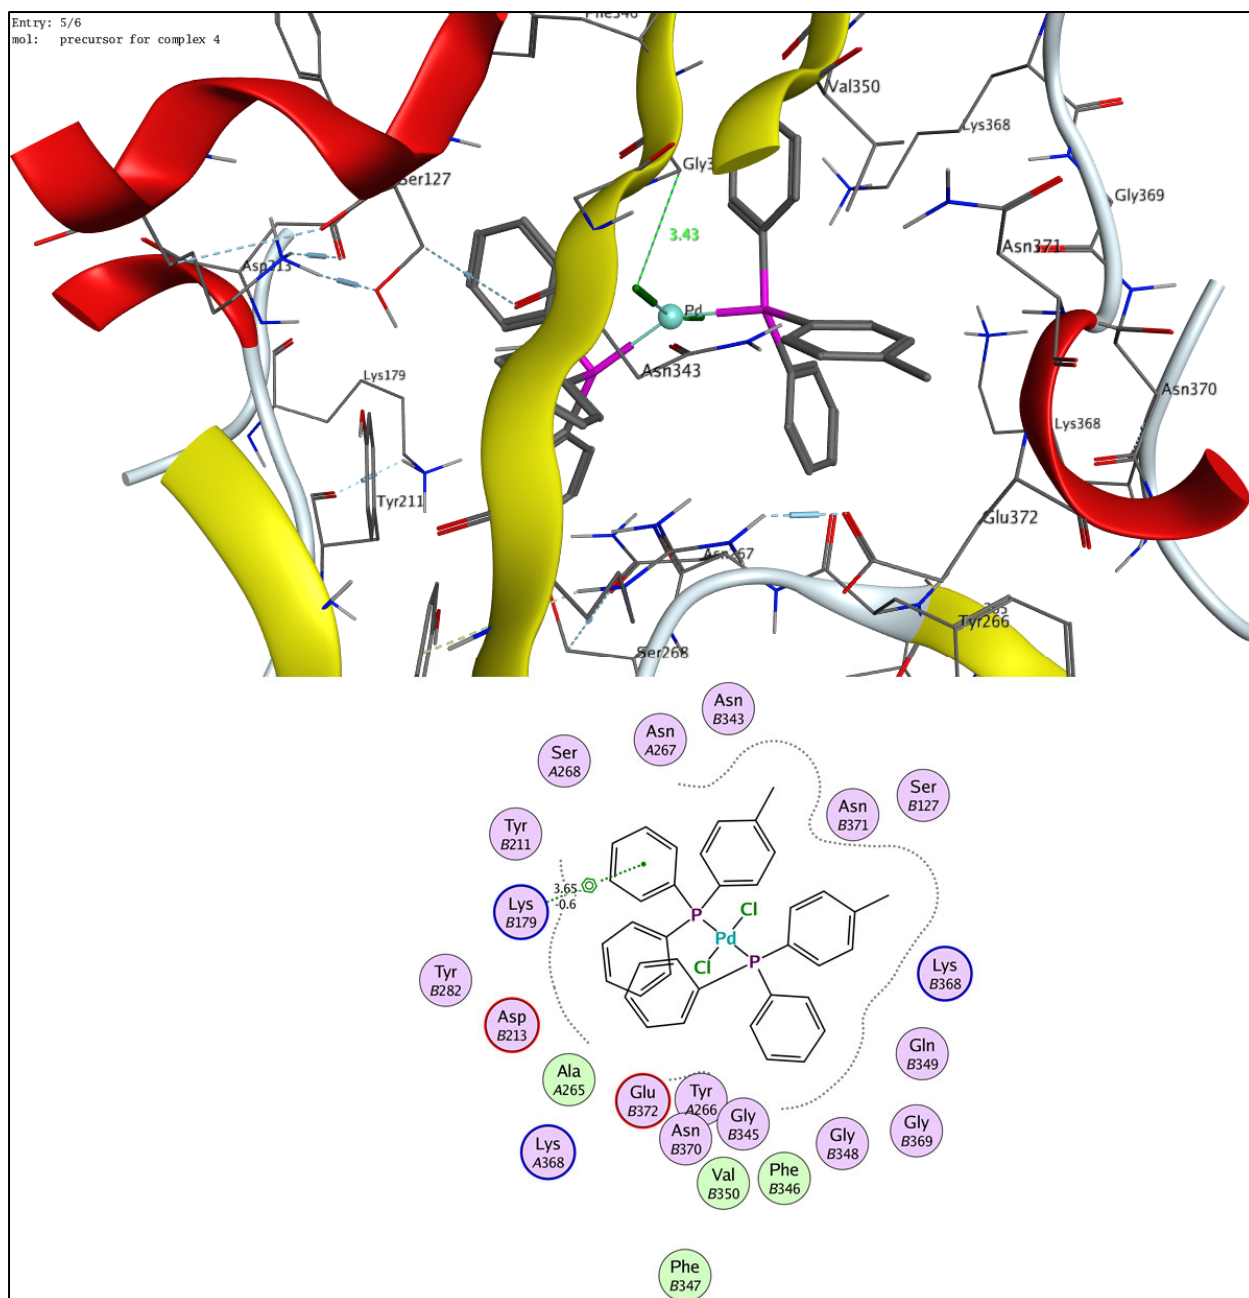

**Figure S6.** (A) Computed and (B) 2D interaction of  $(PR_3)_2PdCl_2$  where  $PR_3$  = diphenyl-p-tolylphosphine precursor with *S. aureus* (PDB\_ID: 5ZH8)

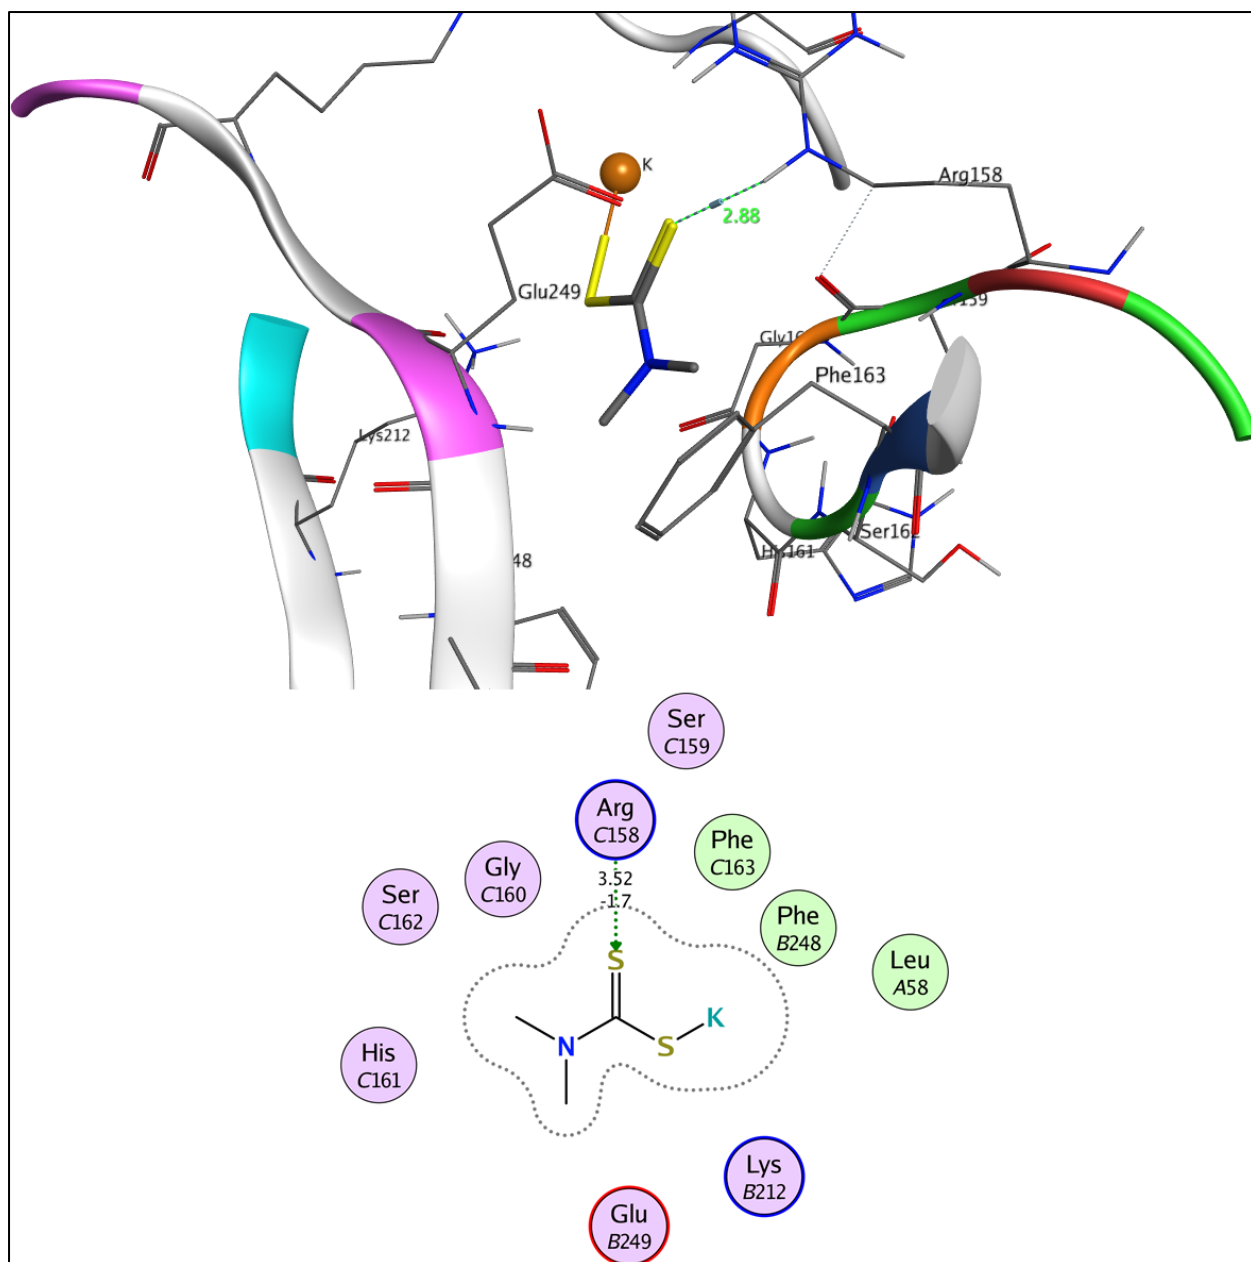

**Figure S7.** (A) Computed and (B) 2D interaction of potassium dimethylcarbamodithioate with DR5 (1DU3).

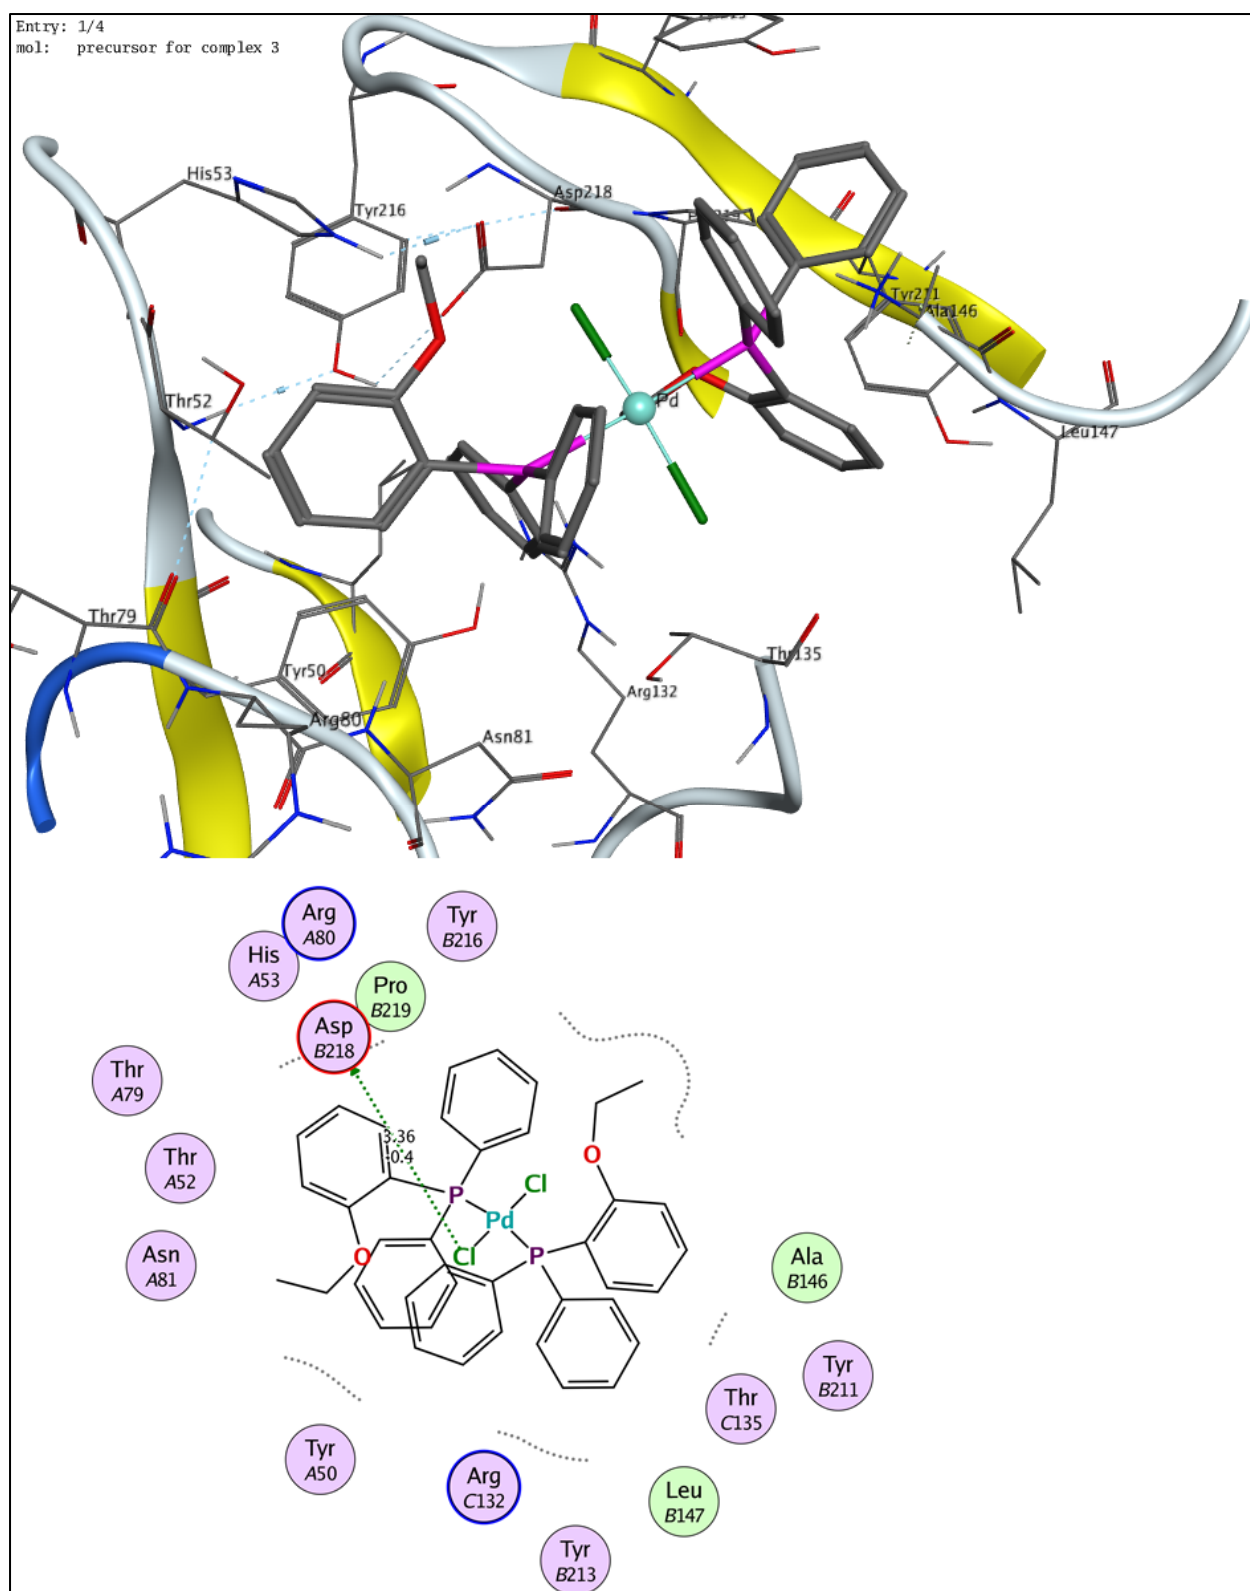

Supplement: s1 [file s1]
